# Supplementary material for: Targeted deep sequencing improves outcome stratification in chronic myelomonocytic leukemia with low risk cytogenetic features
Source: PubMed Central journal article supplement (PMC5302970; doi:10.18632/oncotarget.10937), 2016-07-29
Supplement: oncotarget-07-57021-s001.pdf [file oncotarget-07-57021-s001.pdf]

# Targeted deep sequencing improves outcome stratification in chronic myelomonocytic leukemia with low risk cytogenetic features

## SUPPLEMENTARY FIGURES AND TABLES

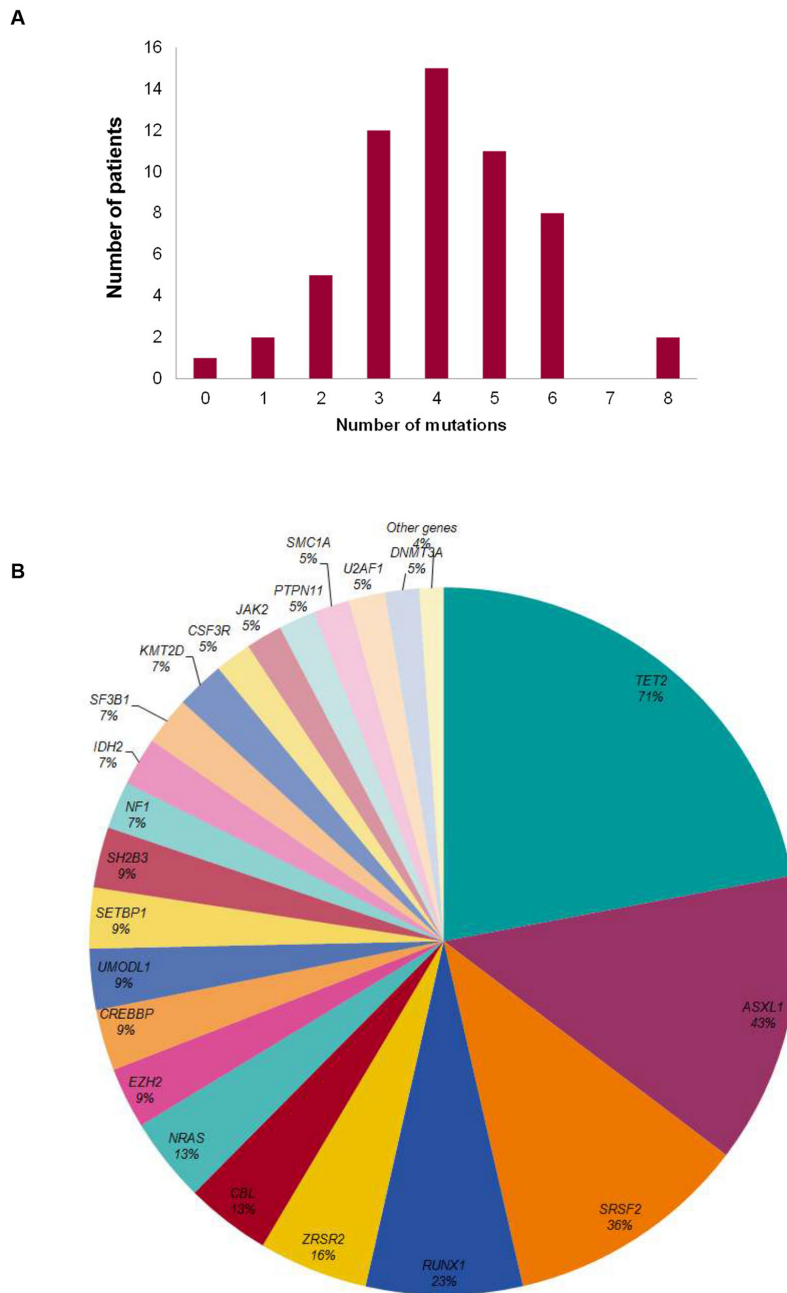

**Supplementary Figure S1: Number and type of mutations across the CMML patients at diagnosis. A.** distribution of number of mutations detected per patient; **B.** frequency of affected genes in the entire cohort. (Continued)

C

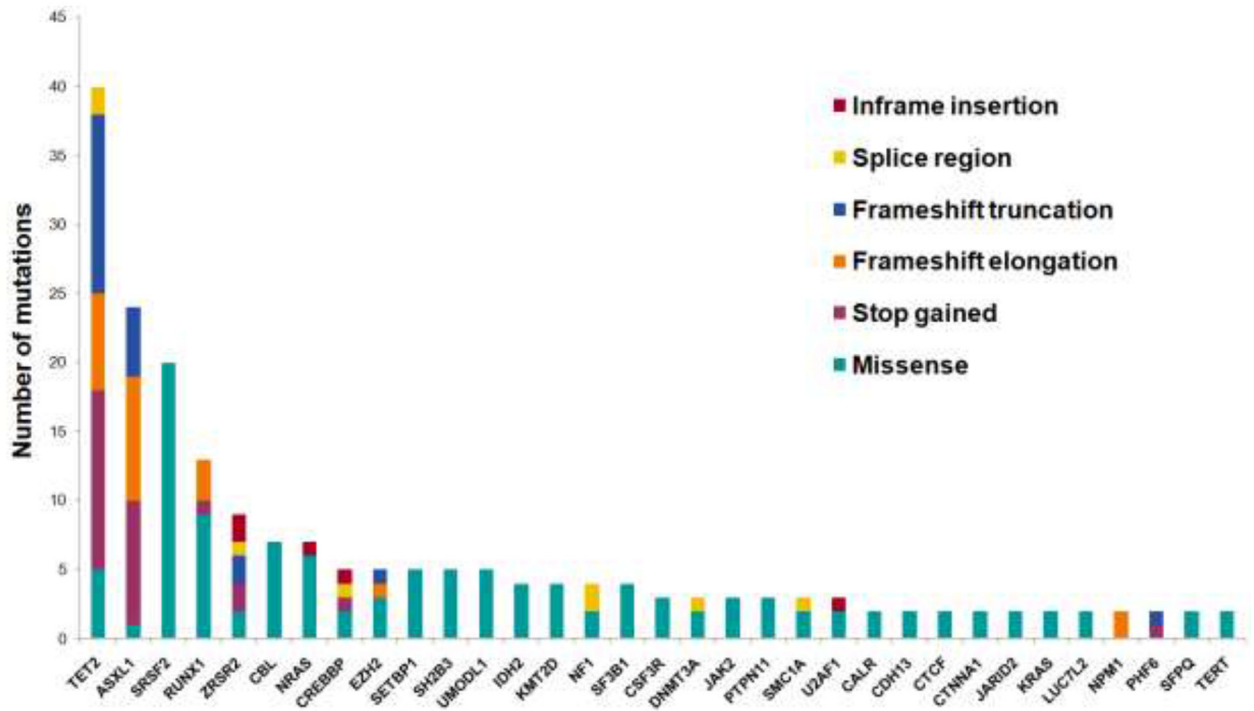

D

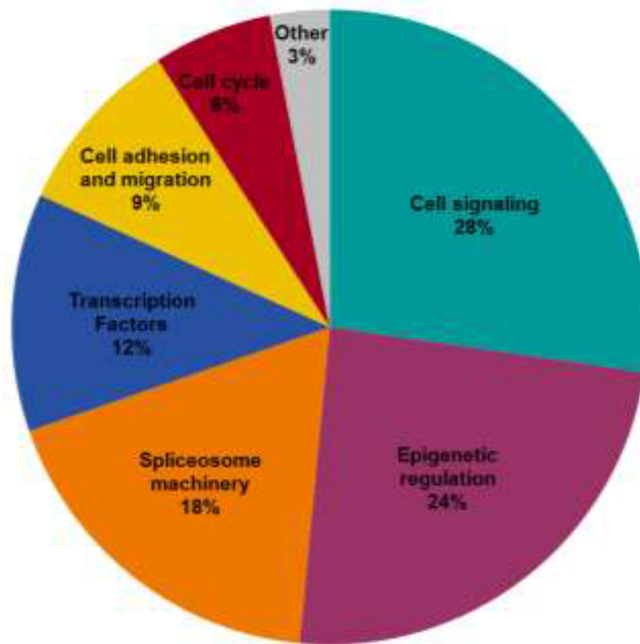

Supplementary Figure S1: (Continued) Number and type of mutations across the CMML patients at diagnosis. C. type of mutation; D. mechanisms in which the main affected genes are involved.

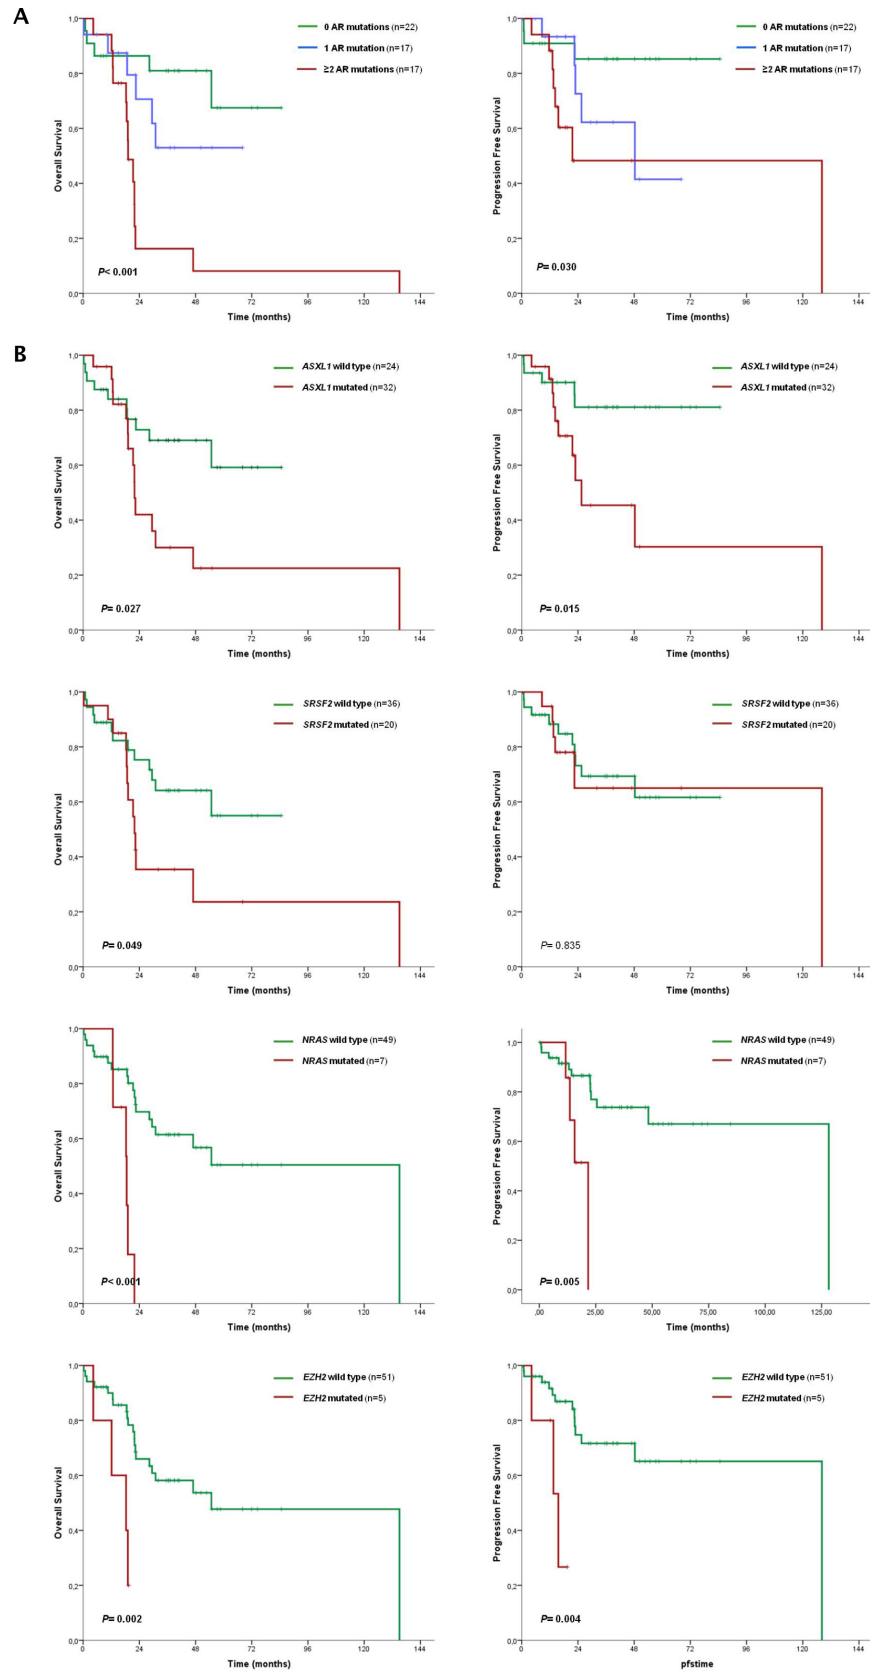

**Supplementary Figure S2: Prognostic impact of gene mutations.** A. OS and PFS curves according to number of total mutations; B. OS and PFS curves according to mutations in individual genes (*ASXL1*, *EZH2*, *NRAS*, *SRSF2* and *TET2*). See Table 3 for 3-year percentage overall survival and progression free survival and confidence intervals. (Continued)

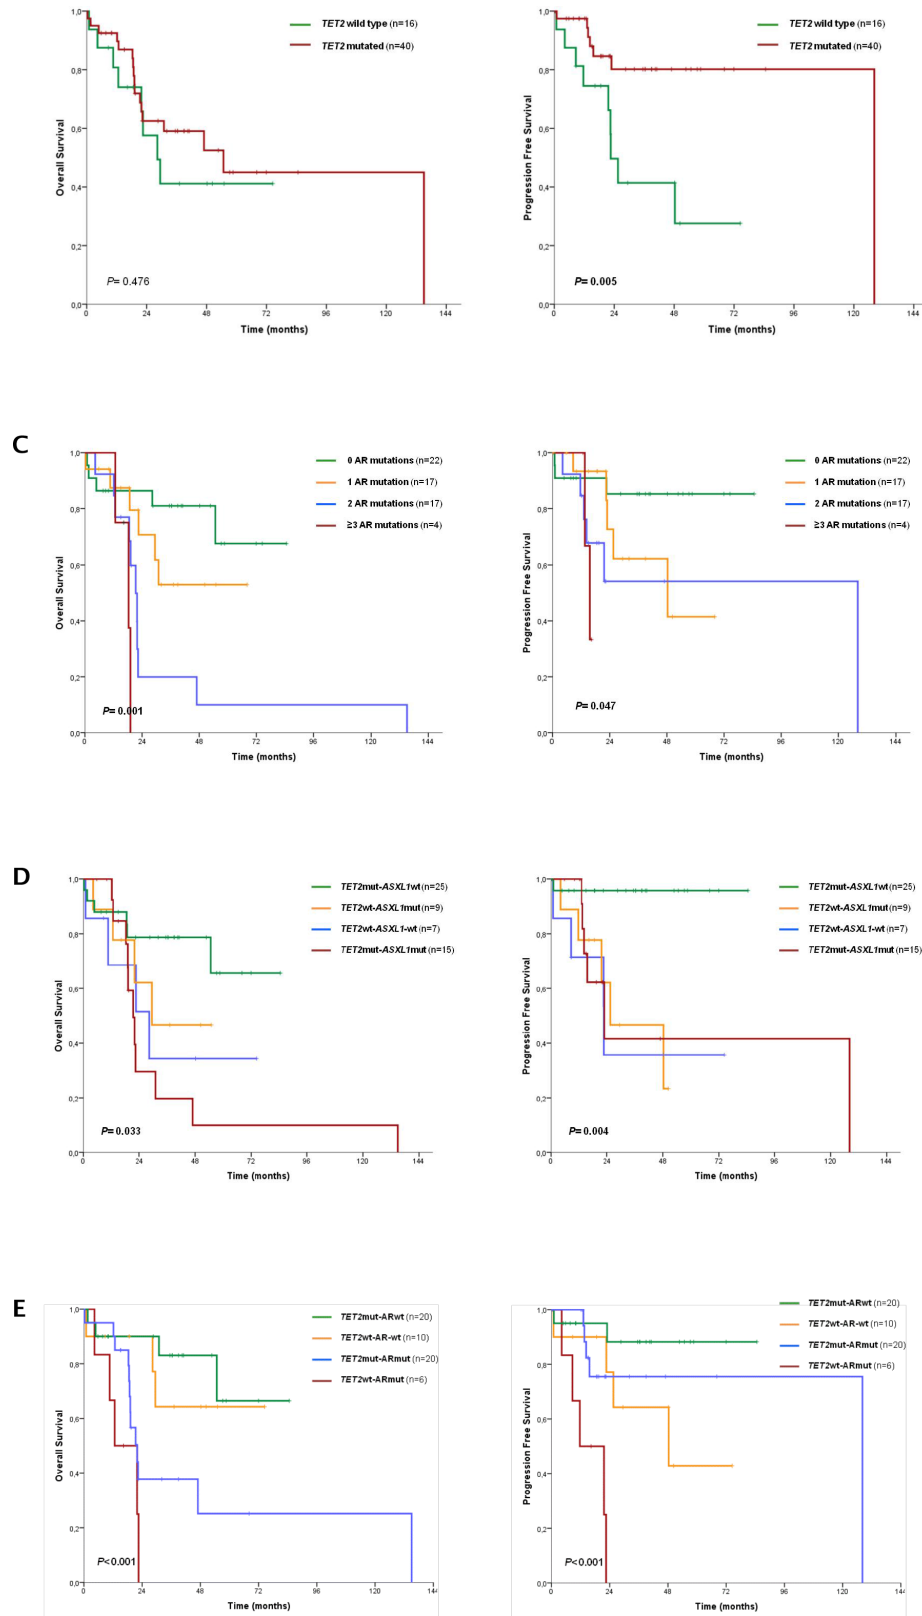

**Supplementary Figure S2: (Continued) Prognostic impact of gene mutations.** C. OS and PFS curves according to number of adverse risk gene mutations (*ASXL1*, *EZH2*, *NRAS*, *SRSF2*); D. OS and PFS curves according to combinations between *ASXL1* and *TET2* mutations. AR mutations: adverse risk gene mutations (*ASXL1*, *EZH2*, *NRAS*, *SRSF2*). E. OS and PFS curves according to combinations between *TET2* mutations and adverse risk genes (excluding *ASXL1*). AR mutations excluding *ASXL1* (*EZH2*, *NRAS*, *SRSF2*). See Table 3 for 3-year percentage overall survival and progression free survival and confidence intervals.

## Supplementary Table S1: Detected variants in the whole cohort of CMML patients at diagnosis (n=56).

See Supplementary File 1

## Supplementary Table S2: List of all the affected genes and frequency in the cohort of CMML patients in samples at diagnosis (n=56)

| Gene          | Number of patients | Cohort frequency | Gene          | Number of patients | Cohort frequency |
|---------------|--------------------|------------------|---------------|--------------------|------------------|
| <i>TET2</i>   | 40                 | 71%              | <i>PHF6</i>   | 2                  | 4%               |
| <i>ASXL1</i>  | 24                 | 43%              | <i>SFPQ</i>   | 2                  | 4%               |
| <i>SRSF2</i>  | 20                 | 36%              | <i>TERT</i>   | 2                  | 4%               |
| <i>RUNX1</i>  | 13                 | 23%              | <i>MECOM</i>  | 1                  | 2%               |
| <i>ZRSR2</i>  | 9                  | 16%              | <i>ATRX</i>   | 1                  | 2%               |
| <i>CBL</i>    | 7                  | 13%              | <i>BCOR</i>   | 1                  | 2%               |
| <i>NRAS</i>   | 7                  | 13%              | <i>CDH3</i>   | 1                  | 2%               |
| <i>EZH2</i>   | 5                  | 9%               | <i>BRAF</i>   | 1                  | 2%               |
| <i>CREBBP</i> | 5                  | 9%               | <i>CUX1</i>   | 1                  | 2%               |
| <i>UMODL1</i> | 5                  | 9%               | <i>EP300</i>  | 1                  | 2%               |
| <i>SETBP1</i> | 5                  | 9%               | <i>FLT3</i>   | 1                  | 2%               |
| <i>SH2B3</i>  | 5                  | 9%               | <i>GATA1</i>  | 1                  | 2%               |
| <i>NF1</i>    | 4                  | 7%               | <i>GCAT</i>   | 1                  | 2%               |
| <i>IDH2</i>   | 4                  | 7%               | <i>GATA2</i>  | 1                  | 2%               |
| <i>SF3B1</i>  | 4                  | 7%               | <i>IDH1</i>   | 1                  | 2%               |
| <i>KMT2D</i>  | 4                  | 7%               | <i>KIT</i>    | 1                  | 2%               |
| <i>CSF3R</i>  | 3                  | 5%               | <i>KMT2A</i>  | 1                  | 2%               |
| <i>JAK2</i>   | 3                  | 5%               | <i>PDGFRA</i> | 1                  | 2%               |
| <i>PTPN11</i> | 3                  | 5%               | <i>PDGFRB</i> | 1                  | 2%               |
| <i>SMC1A</i>  | 3                  | 5%               | <i>PHLPP1</i> | 1                  | 2%               |
| <i>U2AF1</i>  | 3                  | 5%               | <i>RAD21</i>  | 1                  | 2%               |
| <i>DNMT3A</i> | 3                  | 5%               | <i>RPS14</i>  | 1                  | 2%               |
| <i>KRAS</i>   | 2                  | 4%               | <i>SF1</i>    | 1                  | 2%               |
| <i>CTNNA1</i> | 2                  | 4%               | <i>SF3A1</i>  | 1                  | 2%               |
| <i>CDH13</i>  | 2                  | 4%               | <i>SMC3</i>   | 1                  | 2%               |
| <i>CTCF</i>   | 2                  | 4%               | <i>STAG2</i>  | 1                  | 2%               |
| <i>CALR</i>   | 2                  | 4%               | <i>SUZ12</i>  | 1                  | 2%               |
| <i>JARID2</i> | 2                  | 4%               | <i>TIMM50</i> | 1                  | 2%               |
| <i>LUC7L2</i> | 2                  | 4%               | <i>AEBP2</i>  | 1                  | 2%               |
| <i>NPM1</i>   | 2                  | 4%               |               |                    |                  |

**Supplementary Table S3: Patients with gene mutations in regions with copy number neutral loss of heterozygosity (CNN-LOH)**

| Number of patients | CNN-LOH region | Start       | End        | Size        | Mutated gene              |
|--------------------|----------------|-------------|------------|-------------|---------------------------|
| 4                  | 4q13.3q35.2    | 70579280    | 190921709  | 120342429   |                           |
|                    | 4q13.3q35.2    | 89992346    | 190921709  | 100.929.363 | <i>TET2</i>               |
|                    | 4q13.3qter     | 111.229.207 | 79.692.502 | 190.921.709 |                           |
|                    | 4q13.3qter     | 108.964.973 | 81.956.736 | 190.921.709 |                           |
| 3                  | 11q13.3q25     | 65018466    | 134942626  | 69.924.160  | <i>CBL</i>                |
|                    | 11q13.2q25     | 67.393.850  | 134938470  | 67.544.620  |                           |
|                    | 11q13.2q25     | 70339930    | 134939692  | 64599762    |                           |
| 1                  | 7q22.1q36.3    | 98915957    | 159119220  | 60.203.263  | <i>EZH2</i>               |
| 1                  | 17q25.3        | 78.966.914  | 81.041.938 | 2.075.024   | <i>SRSF2</i>              |
| 1                  | 12q21.2q24.33  | 75.863.034  | 133777902  | 57.914.868  | <i>KRAS</i>               |
| 1                  | 7p12.3q21.11   | 45749533    | 77814597   | 32.065.064  | None of the studied genes |
| 1                  | 10p12.1q21.1   | 29074038    | 57196819   | 28.122.781  |                           |
| 1                  | 13q14.11q31.3  | 43719771    | 93333822   | 49.614.051  |                           |
| 1                  | 14q11.2q21.3   | 20511672    | 50870199   | 30.358.527  |                           |

Supplementary Table S4: Genes included in the 83 gene panel

| Gene           | Target region (exon) | Gene          | Target region (exon) | Gene          | Target region (exon) | Gene          | Target region (exon) |
|----------------|----------------------|---------------|----------------------|---------------|----------------------|---------------|----------------------|
| <i>ABL1</i>    | 4-9                  | <i>EED</i>    | full                 | <i>MECOM</i>  | full                 | <i>SF3B1</i>  | 10-16                |
| <i>AEBP2</i>   | full                 | <i>EP300</i>  | full                 | <i>KMT2A</i>  | full                 | <i>SFPQ</i>   | full                 |
| <i>ASXL1</i>   | 9, 11, 12            | <i>ETV6</i>   | full                 | <i>MLL2</i>   | full                 | <i>SH2B3</i>  | full                 |
| <i>ATRX</i>    | full                 | <i>EZH2</i>   | full                 | <i>MPL</i>    | 10                   | <i>SMC1A</i>  | full                 |
| <i>BCOR</i>    | full                 | <i>FLT3</i>   | 14, 15, 20           | <i>NF1</i>    | full                 | <i>SMC3</i>   | full                 |
| <i>BCORL1</i>  | full                 | <i>GATA1</i>  | 2                    | <i>NPM1</i>   | 11, 12               | <i>SPARC</i>  | full                 |
| <i>BRAF</i>    | full                 | <i>GATA2</i>  | full                 | <i>NRAS</i>   | 1-3                  | <i>SRSF2</i>  | 1                    |
| <i>CALR</i>    | 9                    | <i>GCAT</i>   | full                 | <i>PDGFRA</i> | full                 | <i>STAG1</i>  | full                 |
| <i>CBL</i>     | 8, 9                 | <i>GNAS</i>   | full                 | <i>PDGFRB</i> | full                 | <i>STAG2</i>  | full                 |
| <i>CBLB</i>    | 9, 10                | <i>HRAS</i>   | 2, 3                 | <i>PHF6</i>   | full                 | <i>SUZ12</i>  | full                 |
| <i>CDH13</i>   | full                 | <i>IDH1</i>   | 4                    | <i>PHLPP1</i> | full                 | <i>TERC</i>   | full                 |
| <i>CDH3</i>    | full                 | <i>IDH2</i>   | 4                    | <i>PTEN</i>   | 5-8                  | <i>TERT</i>   | full                 |
| <i>CDKN2A</i>  | full                 | <i>IKZF1</i>  | full                 | <i>PTPN11</i> | full                 | <i>TET2</i>   | 2-11                 |
| <i>CEBPA</i>   | full                 | <i>IRF1</i>   | full                 | <i>RAD21</i>  | full                 | <i>TGM2</i>   | full                 |
| <i>CREBBP</i>  | full                 | <i>JAK2</i>   | 12-16                | <i>RPS14</i>  | full                 | <i>TIMM50</i> | full                 |
| <i>CSF3R</i>   | full                 | <i>JAK3</i>   | 13                   | <i>RUNX1</i>  | 3-8                  | <i>TP53</i>   | 4-11                 |
| <i>CSNK1A1</i> | full                 | <i>JARID2</i> | full                 | <i>SALL4</i>  | full                 | <i>U2AF1</i>  | 2, 6                 |
| <i>CTCF</i>    | full                 | <i>KDM6A</i>  | full                 | <i>SBDS</i>   | full                 | <i>UMODL1</i> | full                 |
| <i>CTNNA1</i>  | full                 | <i>KIT</i>    | 2,8-11,13,17         | <i>SETBP1</i> | 4                    | <i>WT1</i>    | 7, 9                 |
| <i>CUX1</i>    | full                 | <i>KRAS</i>   | 1-3                  | <i>SF1</i>    | full                 | <i>ZRSR2</i>  | full                 |
| <i>DNMT3A</i>  | full                 | <i>LUC7L2</i> | full                 | <i>SF3A1</i>  | full                 |               |                      |
